EXPRESSION OF CONCERN

## Expression of Concern: Exploring the determinants of exclusive breastfeeding among infants under-six months in Ethiopia using multilevel analysis

The *PLOS One* Editors

The *PLOS One* Editors issue an Expression of Concern to alert readers that this article [1] was identified as one of a series of submissions for which we have concerns about authorship and adherence to the journal's first and second publication criteria. We regret that these issues were not addressed prior to the article's publication.

In addition, this article [1] reports a similar study and results as an article [2] that was published later by the same authors, and subsequently retracted [3] due to similarity with this article [1].

### References

1. Tsegaw SA, Ali Dawed Y, Tadesse Amsalu E. Exploring the determinants of exclusive breastfeeding among infants under-six months in Ethiopia using multilevel analysis. *PLoS One*. 2021;16(1):e0245034. <https://doi.org/10.1371/journal.pone.0245034> PMID: [33439886](https://pubmed.ncbi.nlm.nih.gov/33439886/)
2. Tsegaw SA, Dawed YA, Amsalu ET. Retracted article: Individual level and community level factors affecting exclusive breast feeding among infants under-six months in Ethiopia using multilevel analysis. *Ital J Pediatr*. 2021;47(1):106. <https://doi.org/10.1186/s13052-021-01062-z> PMID: [33952331](https://pubmed.ncbi.nlm.nih.gov/33952331/)
3. Tsegaw SA, Dawed YA, Amsalu ET. Retraction Note: individual level and community level factors affecting exclusive breast feeding among infants under-six months in Ethiopia using multilevel analysis. *Ital J Pediatr*. 2024;50(1):128. <https://doi.org/10.1186/s13052-024-01699-6> PMID: [39039603](https://pubmed.ncbi.nlm.nih.gov/39039603/)

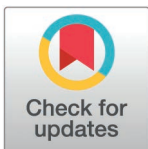

### OPEN ACCESS

**Citation:** The *PLOS One* Editors (2025) Expression of Concern: Exploring the determinants of exclusive breastfeeding among infants under-six months in Ethiopia using multilevel analysis. *PLoS One* 20(7): e0328086. <https://doi.org/10.1371/journal.pone.0328086>

**Published:** July 15, 2025

**Copyright:** © 2025 The *PLOS One* Editors. This is an open access article distributed under the terms of the [Creative Commons Attribution License](https://creativecommons.org/licenses/by/4.0/), which permits unrestricted use, distribution, and reproduction in any medium, provided the original author and source are credited.
